# Supplementary material for: Exogenous Cytokine-Free Differentiation of Human Pluripotent Stem Cells into Classical Brown Adipocytes
Source: MDPI journal article supplement (doi:10.3390/cells8040373), 2019-04-24
Supplement: s1 [file s1]

## Supplementary Materials

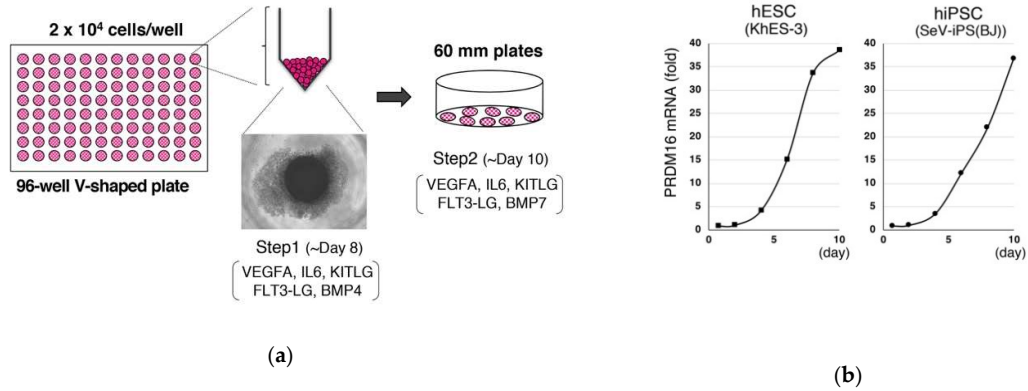

**Figure S1.** A directed differentiation of feeder-free hESCs into classical BA using 96-well v-shaped plates. **(a)** Schematic presentation of the procedure. hESCs and hiPSCs, which were maintained using StemFit™ AK02N (Ajinomoto Healthy Supply Co.) on vitronectin-coated plates, were dissociated into single cell in the presence of a ROCK inhibitor and subjected to spheroid formation by seeding in a low attachment V-shaped 96-well plate (PrimeSurface™ 96V well culture plate). Cells were cultured for eight days using the differentiation medium supplemented by a cytokine cocktail with half-change of medium every other day, followed by adherent culture for successive two days in 60 mm gelatin-coated plates using the differentiation medium supplemented by another cytokine cocktail as previously described. **(b)** hESC and hiPSC were collected at indicated time after an induction of differentiation. PRDM16 mRNA expressions were examined by RT-qPCR.
